# Supplementary material for: Outer membrane proteome and its regulation networks in response toglucose concentration changes in Escherichia coli
Source: Royal Society of Chemistry journal article supplement (doi:10.1039/c1mb05193h), 2011-08-18
Supplement: c1mb05193h.pdf [file c1mb05193h.pdf]

### Supplemental Figure 1

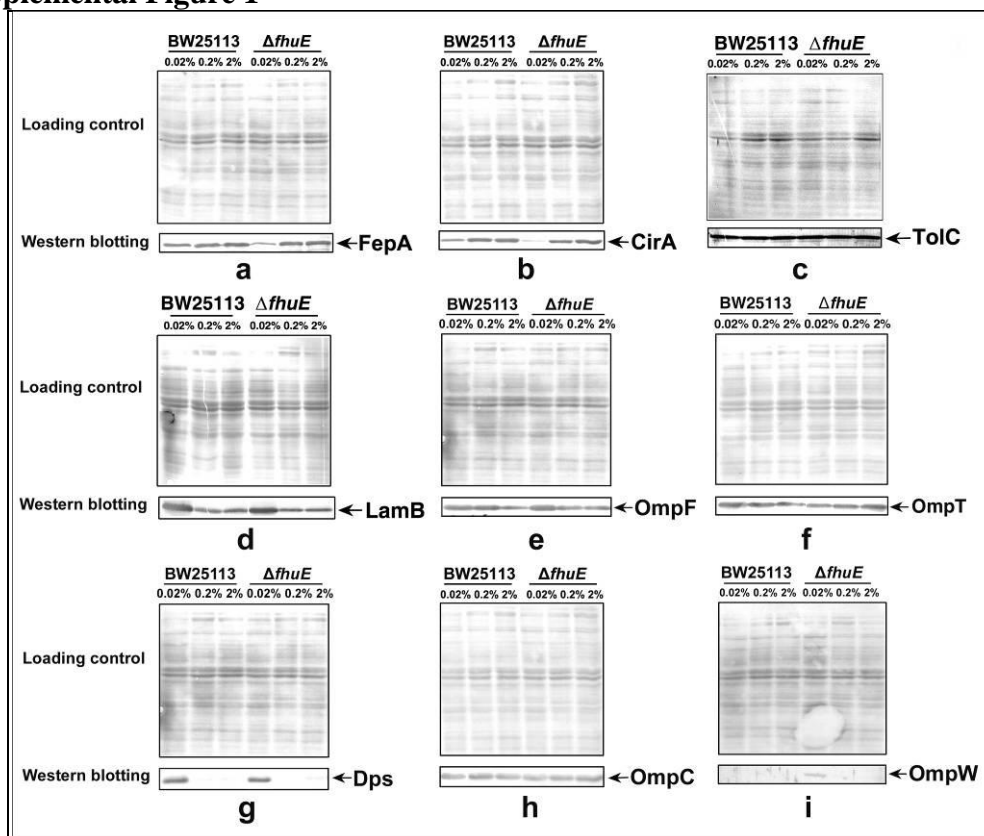

A

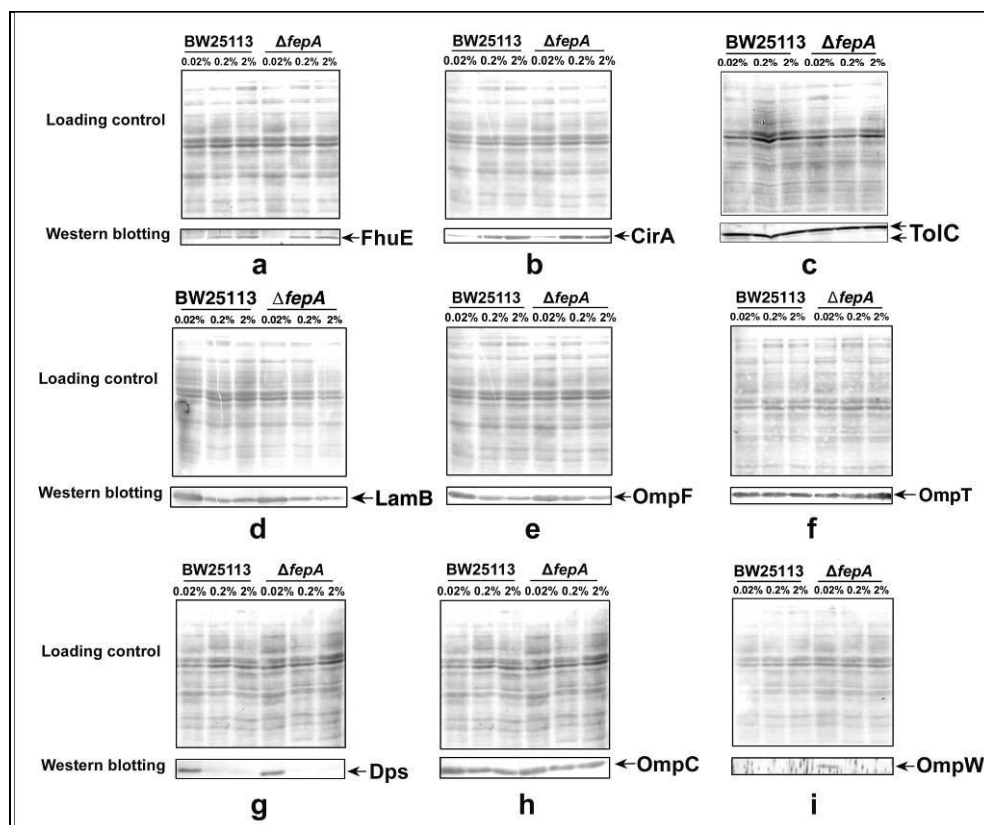

### B

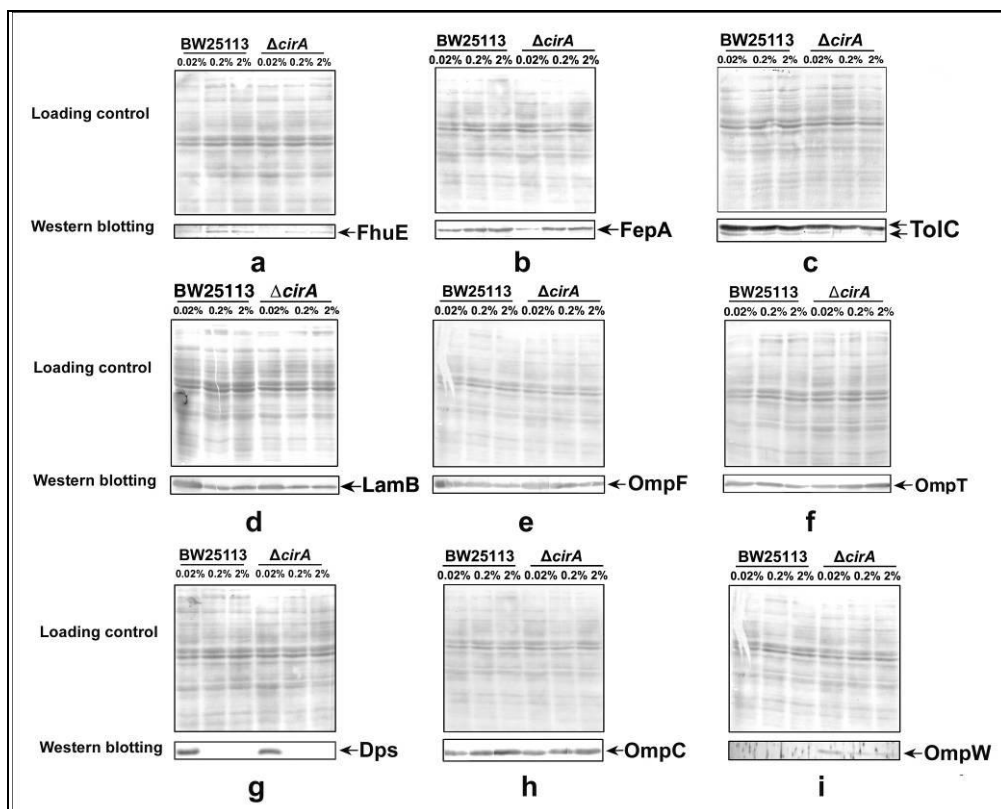

### C

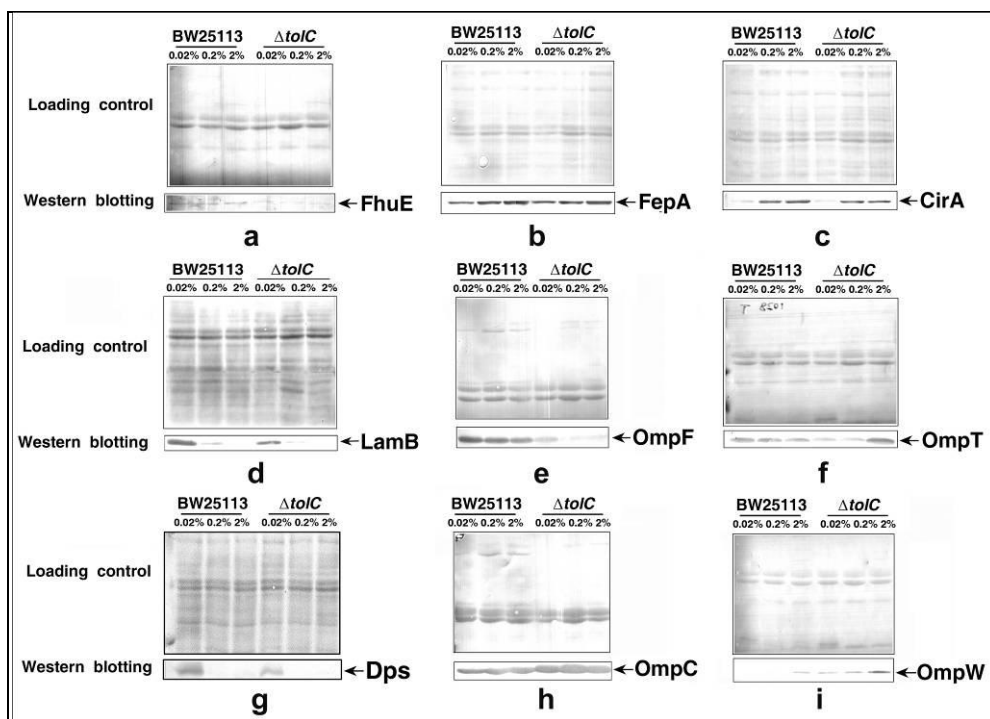

### D

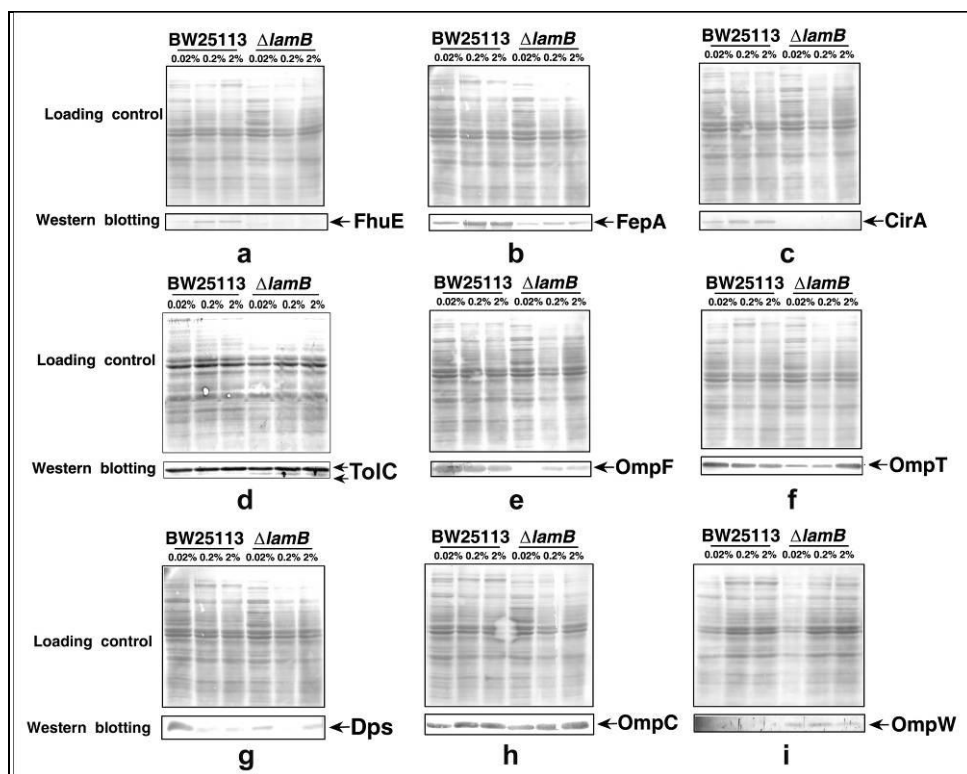

E

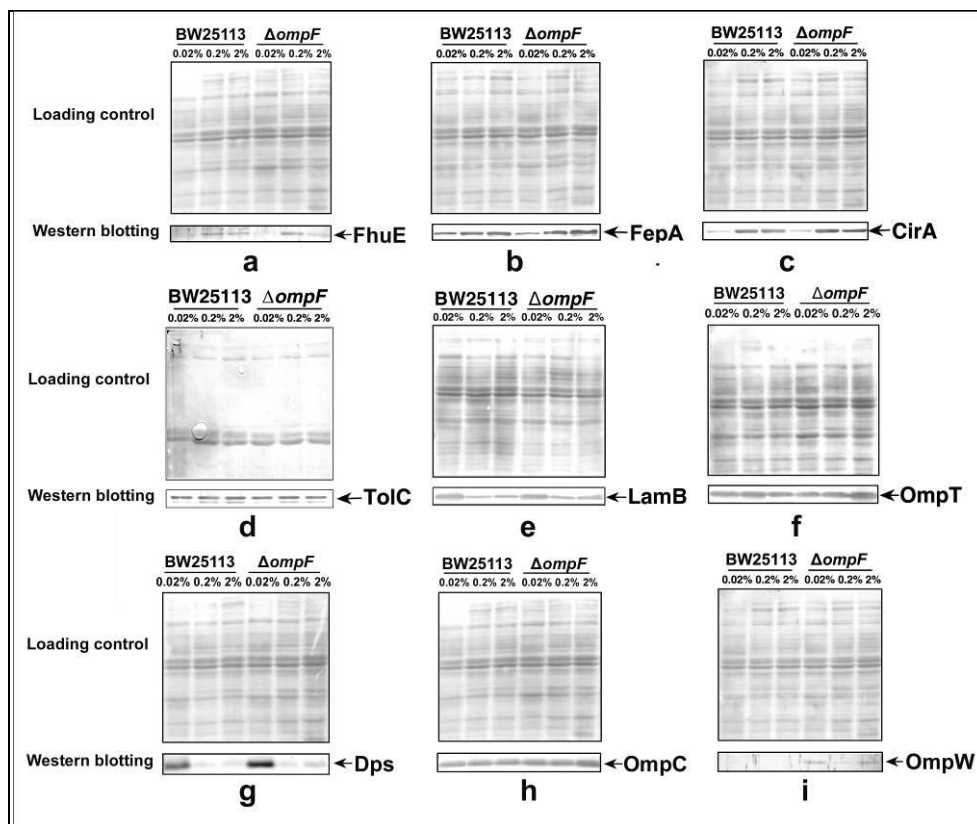

F

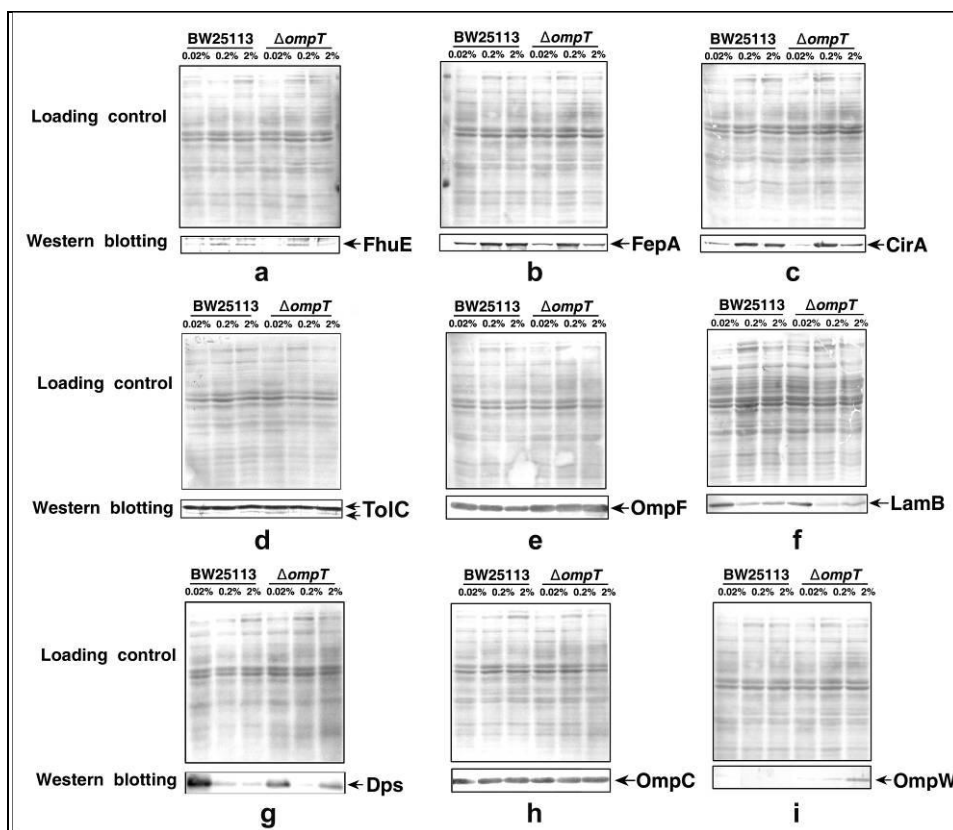

G

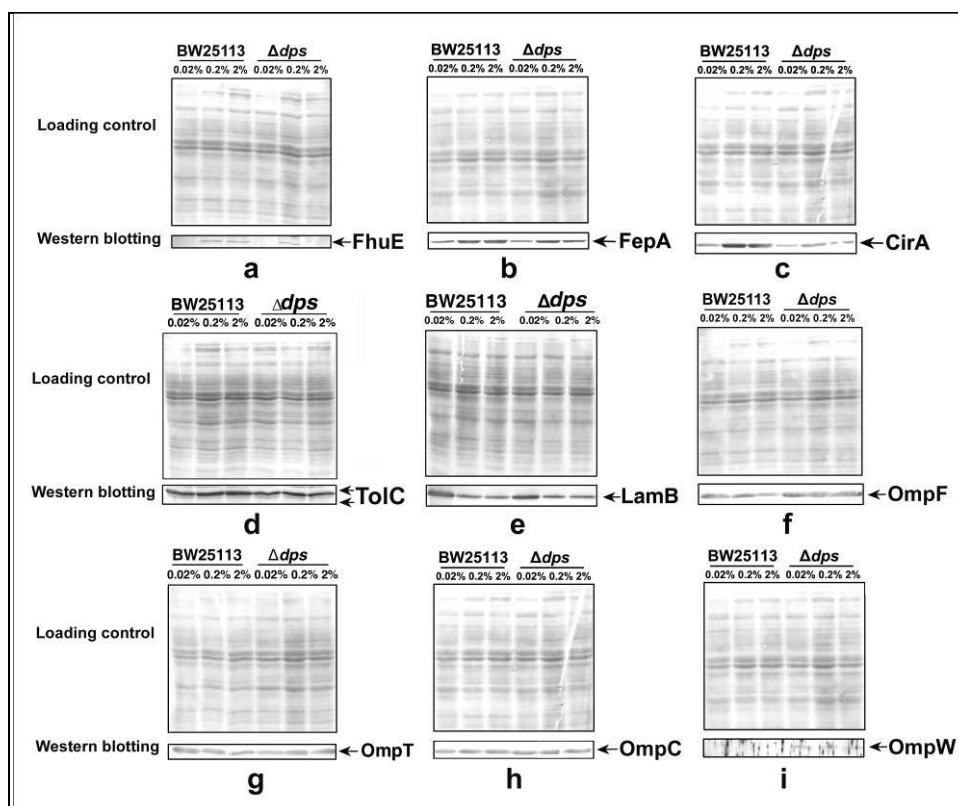

H

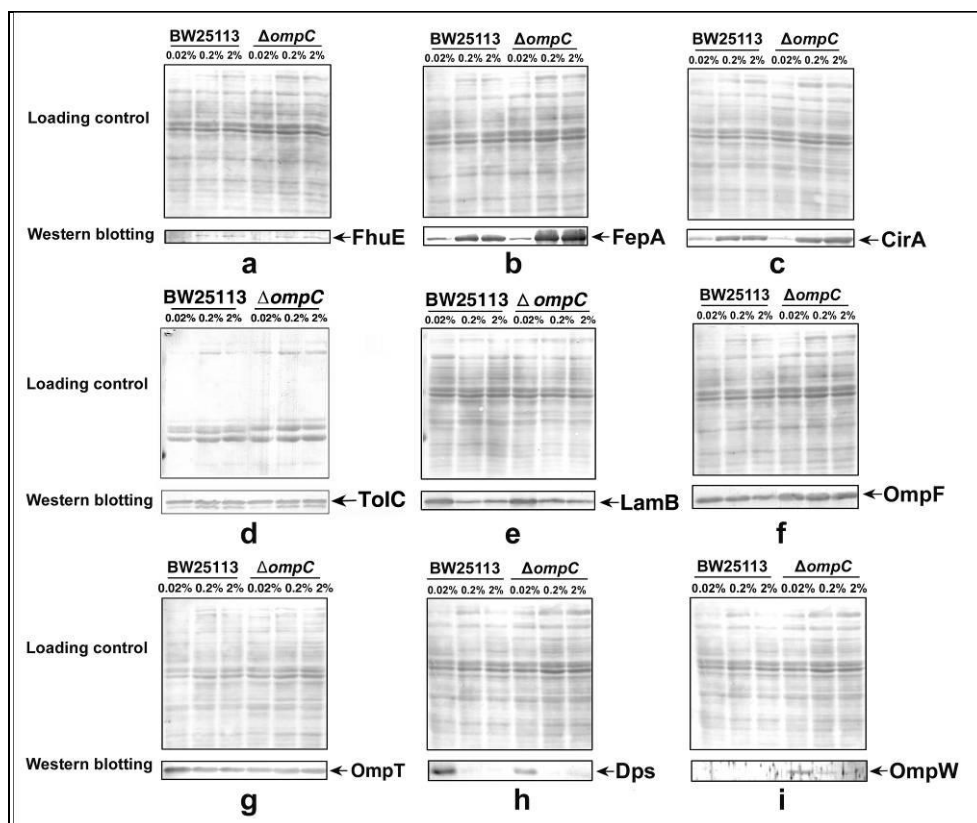

I

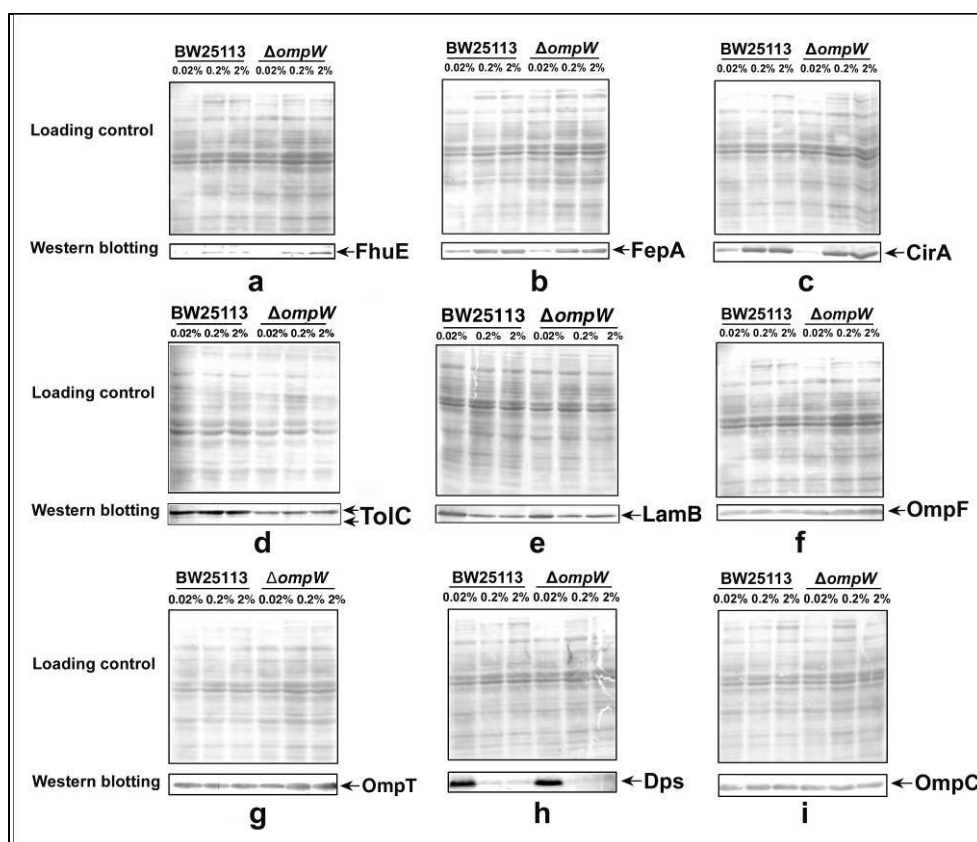

J

**Supplemental Figure 1 Protein interactions in *E. coli* k12 BW25113 cultured in medium with different concentrations of glucose. 3A-J effect of *fhuE*, *FepA*, *CirA*, *TolC*, *LamB*, *OmpF*, *OmpT*, *Dps* and *OmpC* deletion strains on expression of other eight OM protein in the medium with 0.02, 0.2 and 2% glucose.**
